# Supplementary material
Source: MDPI journal article supplement (https://www.mdpi.com/2073-4395/13/12/2942)
Supplement: s1 [file s1]

**Table S1.** Number of known miRNAs in each miRNA family

| miR_name                     | miR_seq                  | len | genome ID            | Expression level |
|------------------------------|--------------------------|-----|----------------------|------------------|
| stu-miR156f-3p_1ss21TC       | CTCACTTCTCTTCTGTCAACC    | 22  | JH137904.1           | middle           |
| stu-miR156e                  | TGACAGAAGAGAGTGAGCAC     | 20  | PGSC0003DMG400008217 | middle           |
| stu-miR156g-3p_L-1R+2        | CTTACTCTCTATCTGTCAACCC   | 22  | PGSC0003DMG400008217 | middle           |
| stu-miR156a_R+1              | TTGACAGAAGATAGAGAGCACA   | 22  | JH138336.1           | middle           |
| stu-miR162a-5p_L+1           | TGGAGGCAGCGGTTTCATCGATC  | 22  | PGSC0003DMG400004057 | middle           |
| stu-miR162a-3p               | TCGATAAACCTCTGCATCCAG    | 21  | PGSC0003DMG400004057 | high             |
| stu-MIR162a-p3               | AAGCGATCGATAAACCTCTGCATC | 24  | PGSC0003DMG400004057 | middle           |
| stu-miR164-5p_R+1_1ss21TC    | TGGAGAAGCAGGGCACATGCCG   | 22  | JH138033.1           | low              |
| stu-miR164-3p                | CATGTGCTCTAGCTCTCCAGC    | 21  | JH138033.1           | low              |
| stu-miR166d-5p_2ss8CT20GA    | AGAATGTTGTCTGGTTCGAAA    | 21  | JH138443.1           | low              |
| stu-miR166a-3p_L+1R-1_1ss9AG | TTCGGACCGGGCTTCATTCCC    | 21  | JH138443.1           | low              |
| stu-miR166a-5p_1ss1GN        | NGAATGTTGTCTGGCTCGAGG    | 21  | JH137800.1           | low              |
| stu-miR166a-3p_L+1_1ss6AG    | GTCGGGCCAGGCTTCATTCCCC   | 22  | JH137800.1           | low              |
| stu-miR166a-3p_L+1_1ss6AG    | GTCGGGCCAGGCTTCATTCCCC   | 22  | JH137934.1           | low              |
| stu-miR166b_2ss18CT19CT      | TCGGACCAGGCTTCATTTTTC    | 21  | JH137916.1           | low              |
| stu-miR167d-3p_L+2           | CAGATCATGTGGTTGCTTCACC   | 22  | JH138225.1           | middle           |
| stu-miR167a-3p_L+1_1ss4TG    | AGAGCATGTGGCAGCCTCACC    | 21  | JH137937.1           | low              |
| stu-miR167a-5p               | TGAAGCTGCCAGCATGATCTA    | 21  | JH137901.1           | high             |
| stu-miR167c-3p_L-1           | GTCATGCTCGGACAGCCTCACT   | 22  | JH137901.1           | low              |
| stu-miR167a-5p               | TGAAGCTGCCAGCATGATCTA    | 21  | JH137901.1           | high             |
| stu-miR167b-3p_L+4           | ATCAGATCATGTGGCAGCATCACC | 24  | JH137901.1           | middle           |
| stu-miR169d-3p_L+1           | AGCAGGTCATCTTTAGCTAACT   | 22  | JH138085.1           | low              |
| stu-miR171b-5p_1ss12TC       | AGATATTGATGCGGCTCAATC    | 21  | JH138432.1           | low              |
| stu-miR171b-3p               | TTGAGCCGCGTCAATATCTCT    | 21  | JH138432.1           | middle           |
| stu-miR171d-5p               | AGATATTGGTGCGGTTCAATT    | 21  | JH137887.1           | low              |
| stu-miR171d-5p               | AGATATTGGTGCGGTTCAATT    | 21  | JH137887.1           | low              |
| stu-miR172e-5p_L-2R+3        | AACATCATCAAGATTCACAAAA   | 22  | JH138154.1           | low              |
| stu-miR172a-3p               | AGAATCTTGATGATGCTGCAT    | 21  | JH138154.1           | middle           |
| stu-miR172d-3p_1ss4AG        | GGAGTCTTGATGATGCTGCAG    | 21  | JH137992.1           | low              |
| stu-MIR319-p5_1ss18CT        | TGCTGCTGAATCATTGGTTC     | 20  | PGSC0003DMG402005658 | middle           |
| stu-miR319-3p_L+1R-1_1ss17CT | CTTGACTGAAGGGTTTCCTT     | 21  | PGSC0003DMG402005658 | middle           |
| stu-miR319a-3p               | TTGACTGAAGGGAGCTCCCT     | 21  | JH137840.1           | high             |
| stu-miR390-5p_L-3_1ss13GT    | CTCAGGAGGTATAGACC        | 18  | JH138232.1           | low              |
| stu-miR390-3p_1ss21AT        | CGCTATCCATCTTGAGTTTTT    | 21  | JH138232.1           | low              |
| stu-miR391-5p_L-1R+2         | ACGCAGGAGAGATGATGCTGGA   | 22  | PGSC0003DMG400020777 | middle           |
| stu-MIR391-p3                | TTAATTATTGGCCAGCATCA     | 21  | PGSC0003DMG400020777 | low              |
| stu-miR393-5p                | TCCAAAGGGATCGCATTGATCC   | 22  | JH137943.1           | middle           |
| stu-miR396-3p                | GTCCAAGAAAGCTGTGGGAAA    | 21  | JH138058.1           | low              |
| stu-miR397-5p_1ss17AG        | ATTGAGTGACGCGTTGGTGAC    | 21  | JH138102.1           | middle           |
| stu-miR397-3p_R-2            | CATCAACGCTACACTCAAT      | 19  | JH138102.1           | middle           |
| stu-miR398a-5p               | GGGTTGATTGAGAACATATG     | 21  | JH138006.1           | middle           |
| stu-miR398b-3p_1ss13GT       | TTGTGTTCTCAGTTCACCCCT    | 21  | JH138056.1           | low              |

|                              |                              |    |                      |        |
|------------------------------|------------------------------|----|----------------------|--------|
| stu-miR398a-3p               | TATGTTCTCAGGTCGCCCCTG        | 21 | PGSC0003DMG400004715 | high   |
| stu-miR399i-3p               | TGCCAAAGGAGAGTTGCCCTA        | 21 | JH138739.1           | low    |
| stu-miR399j-3p               | CGCCAAAGGAGAGCTGCCCTG        | 21 | JH137943.1           | low    |
| stu-miR408a-5p               | ACAGGGACGAGGCAGCGCATG        | 21 | PGSC0003DMG400018286 | middle |
| stu-miR408a-3p               | TGCACAGCCTCTTCCCTGGTT        | 21 | PGSC0003DMG400018286 | high   |
| stu-miR408b-5p               | ACGGGGACGAGACAGAGCATG        | 21 | PGSC0003DMG400018304 | middle |
| stu-miR408b-3p               | TGCACTGCCTCTTCCCTGGCT        | 21 | PGSC0003DMG400018304 | high   |
| stu-miR477b-5p               | ACTCTCCCTCAAAGGCTTCTG        | 21 | JH137800.1           | middle |
| stu-miR477b-3p_L+2           | TAGAGGTCTTTCGAGTGAGAGTG<br>A | 24 | JH137800.1           | middle |
| stu-miR477a-5p               | CCTCTCCCTCAAGGGCTTCTC        | 21 | JH137800.1           | middle |
| stu-miR479_L+2               | AATGAGCCGAACCAATATCACTC      | 23 | JH137915.1           | low    |
| stu-miR482d-5p               | CGTGAGTGGTGGGGTAAGATA        | 21 | JH138014.1           | low    |
| stu-miR482b-5p               | GGAGTGGGTGGCATGGTAAGA        | 21 | PGSC0003DMG400030780 | low    |
| stu-miR482b-3p               | TTACCGATTCCCCCATTCCAA        | 22 | PGSC0003DMG400030780 | high   |
| stu-miR482a-5p               | GGAATTGGTGGATTGGAAGC         | 21 | PGSC0003DMG400024677 | middle |
| stu-miR482a-3p               | TTTCCAATTCCACCCATTCTA        | 22 | PGSC0003DMG400024677 | high   |
| stu-miR482e-5p               | AGTGGGTGGTGTGGTAAGATT        | 21 | PGSC0003DMG400030780 | middle |
| stu-miR482e-3p               | TCTTGCCAATACCGCCCATTC        | 22 | PGSC0003DMG400030780 | high   |
| stu-miR530_L-2R+2            | TGCATTGTCACCTGCACCTTA        | 21 | JH137965.1           | middle |
| stu-miR827-5p                | TTTGTGATGGTCATCTATTC         | 21 | JH137826.1           | middle |
| stu-miR1886h_L-1R+1_1ss5TC   | TTTCACGTTGATTTCATCTCATGA     | 24 | JH137948.1           | low    |
| stu-miR1886a_1ss17AG         | ATGGTATCGTGAGATGGAATCAGC     | 24 | PGSC0003DMG400020212 | middle |
| stu-MIR1886a-p3_1ss15TC      | ATTTTACGCTGATTCCATCTCATG     | 24 | PGSC0003DMG400020212 | middle |
| stu-miR3627-5p               | TCGCAGGAGAGATGGCACTTAG       | 22 | JH137794.1           | middle |
| stu-miR3627-3p_1ss11GA       | AAGTGCCTCTATCTTTCGACA        | 21 | JH137794.1           | low    |
| stu-MIR5303d-p5              | CGGATTCTCCAAAAATACACTACT     | 24 | PGSC0003DMG400014722 | low    |
| stu-miR5303a_R-1_2ss9AG21AG  | TTTTGGAGGATCCGACACGCGCC      | 23 | PGSC0003DMG400014722 | middle |
| stu-MIR5303c-p5_1ss8GA       | GTGTCGGATTCTCCAAAAATACAC     | 24 | PGSC0003DMG400000462 | low    |
| stu-miR5303a_R-1_2ss9AG21AG  | TTTTGGAGGATCCGACACGCGCC      | 23 | PGSC0003DMG400000462 | middle |
| stu-miR5303f_1ss13TC         | ATTTTGGAGAACCTGACACGGGT      | 24 | PGSC0003DMG402028796 | middle |
| stu-miR5303e_L-3_2ss20GA24TC | TGGAGAATCTGACACGAGTGC        | 21 | JH137948.1           | low    |
| stu-miR5303h_2ss5TA18TC      | AACAATTTGAAGAGTCCGAGCA<br>A  | 24 | JH138058.1           | low    |
| stu-MIR5303j-p5_2ss10GT17CT  | ATTCAAATTTCTGCCCTA           | 18 | PGSC0003DMG400023482 | middle |
| stu-miR5303j_1ss18TC         | AATATTTTGAAGAGTCCGAGCAA      | 24 | PGSC0003DMG400023482 | low    |
| stu-miR5303g_L-3_1ss19AG     | TTTTTGAAGAGTCTGGGCAAC        | 21 | JH137902.1           | middle |
| stu-miR5304-5p               | CAATGCAACATACTCATCACC        | 21 | PGSC0003DMG400001656 | low    |
| stu-MIR6023-p5               | AATCTCTGATCATATTCCATG        | 21 | PGSC0003DMG400004697 | low    |
| stu-MIR6023-p3               | TATGAGCCGAGATTGGTGTCT        | 21 | PGSC0003DMG400004697 | middle |
| stu-miR6024-5p               | AGAAACAACACTTGCTAAAAGA       | 22 | JH137968.1           | middle |
| stu-miR6024-3p               | TTTAGCAAGAGTTGTTTCCC         | 22 | JH137968.1           | high   |
| stu-miR6025                  | TACCAACAATTGAGATAACATC       | 22 | PGSC0003DMG401002858 | high   |
| stu-MIR6025-p3               | TTATTGAACCTTGATGTTATC        | 21 | PGSC0003DMG401002858 | middle |

|                                    |                              |    |                      |        |
|------------------------------------|------------------------------|----|----------------------|--------|
| stu-miR6026-5p_1ss12TA             | AATACAACCTATAGCCAAGACAA      | 22 | JH137959.1           | middle |
| stu-miR6027_R-1                    | TGAATCCTTCGGCTATCCATA        | 21 | JH137798.1           | high   |
| stu-miR6149-5p                     | TTGCAACACACCTGAATCGTC        | 21 | JH137942.1           | high   |
| stu-miR6149-3p                     | TGATTCAAGTTTGTATGCAAAC       | 22 | JH137942.1           | middle |
| stu-miR7122-5p                     | TTATACAGAGAAACCGCTGTCTG      | 22 | JH137909.1           | middle |
| stu-miR7122-3p                     | ACAGCGTTTCTCTGTATAACC        | 21 | JH137909.1           | middle |
| stu-miR7979                        | AGGTACATGAACTCTAACGAGGC<br>A | 24 | PGSC0003DMG400016611 | low    |
| stu-MIR7980b-p5_2ss4AG24TC         | ATGGAATCATGAGATGGAATCAGC     | 24 | PGSC0003DMG400002105 | middle |
| stu-MIR7980b-p3_2ss18TC22CA        | ACACTGATTCCATCTCACGATAACC    | 24 | PGSC0003DMG400002105 | low    |
| stu-MIR7980b-p5_2ss9AG24TC         | ATGAAATCGTGAGATGGAATCAGC     | 24 | PGSC0003DMG400019716 | low    |
| stu-miR7980b-3p_1ss8AC             | GAGATGGCATCAGTGTGGACAT       | 24 | JH138233.1           | low    |
| stu-MIR7981-p5_2ss14TC23AC         | ACACCTTTTGGACCTACGTGGCCT     | 24 | PGSC0003DMG401013613 | low    |
| stu-MIR7981-p3_1ss16TC             | AGTGTGCCACGTAAGCCAAAAGG<br>T | 24 | PGSC0003DMG401013613 | low    |
| stu-MIR7981-p5_2ss6TA23CG          | AACTAAGGTCCTATTACCCCTGA      | 24 | PGSC0003DMG400001340 | low    |
| stu-MIR7981-p3_1ss16TA             | AGTGTGCCACGTAAGACAAAAGG<br>T | 24 | PGSC0003DMG400001340 | low    |
| stu-miR7981-3p                     | ATAGGACTTTAGTTTAGTTAAGGT     | 24 | JH138445.1           | low    |
| stu-MIR7982a-p5                    | AAAAGGTGAGATTCTGAGATGGG<br>T | 24 | PGSC0003DMG400013606 | middle |
| stu-MIR7982a-p3_1ss6TG             | AATATGCCTGGTAAGTTGGATGAT     | 24 | PGSC0003DMG400013606 | middle |
| stu-MIR7983-p5_2ss5TC21TA          | AAAGCCTTTAGCGACATTGGATCT     | 24 | PGSC0003DMG400013947 | middle |
| stu-MIR7983-p3_1ss6GA              | TAATGACACTTAACTAATGCCGGT     | 24 | PGSC0003DMG400013947 | middle |
| stu-miR7983-3p_R-1                 | ACTAATGCCGGTAAAGACTTTAA      | 23 | JH138561.1           | low    |
| stu-miR7984c-5p_L-4R+1_1ss19A<br>G | TACCAAACCTTTATGGAGGACC       | 21 | JH138777.1           | low    |
| stu-MIR7984c-p5_1ss16CT            | AAAGGTATATATGTGTCCACG        | 21 | PGSC0003DMG400029712 | low    |
| stu-MIR7984c-p3_1ss9TC             | AAGGTCCTCCATAAAGTTTGGTAT     | 24 | PGSC0003DMG400029712 | middle |
| stu-MIR7984a-p5_1ss11TG            | ACTTTGGAAAGGACCTTTTACCCC     | 24 | PGSC0003DMG400002585 | middle |
| stu-MIR7984a-p3_1ss14TA            | ATATTGCATCATTATAAATAGTAA     | 24 | PGSC0003DMG400002585 | low    |
| stu-MIR7984b-p5_1ss2TG             | AGGACCTTTTACCCCTGCACTATT     | 24 | PGSC0003DMG400017110 | middle |
| stu-MIR7984b-p3_2ss16TC22AG        | AAATAGTAACGTGTCCACGTGGGC     | 24 | PGSC0003DMG400017110 | middle |
| stu-MIR7984d-p5_1ss6AC             | AGGACCTTTTACCCCTGCACTATT     | 24 | PGSC0003DMG400015845 | middle |
| stu-MIR7984d-p3_1ss20TG            | AAATAGTGCAGGGGTAAAAGGTC<br>C | 24 | PGSC0003DMG400015845 | middle |
| stu-miR7984a_2ss6GA22CT            | ATACCAAACCTTTGGAATGACTTT     | 24 | PGSC0003DMG400002275 | low    |
| stu-MIR7984a-p3_2ss17GA22GA        | AAATAGTAATGTGTCCACATGAGC     | 24 | PGSC0003DMG400002275 | low    |
| stu-MIR7984a-p5_1ss10CA            | ACCCCCCTGAACTATTTAATAGTG     | 24 | PGSC0003DMG400041221 | low    |
| stu-MIR7985-p5                     | TCTGGGTCGAGCTCGTCGCACC       | 22 | PGSC0003DMG400008828 | middle |
| stu-MIR7985-p3_1ss14GA             | AGCTCGTCGCACCAGGCTTGCC       | 22 | PGSC0003DMG400008828 | middle |
| stu-MIR7987-p5_1ss16TC             | TGATGACCGAATTGACTCTTCT       | 22 | PGSC0003DMG400006505 | low    |
| stu-MIR7987-p3_2ss13TC24AG         | TGACCGAATTGACTCTTCTAGTAG     | 24 | PGSC0003DMG400006505 | low    |
| stu-miR7991a_L-1R-2                | GGAGGTCGGAATTTTAAATGA        | 21 | PGSC0003DMG400047113 | low    |

|                             |                               |    |                      |        |
|-----------------------------|-------------------------------|----|----------------------|--------|
| stu-MIR7991a-p3             | AATTACAATAAAAAACCGACCTCTT     | 24 | PGSC0003DMG400047113 | low    |
| stu-miR7993a_R-5_1ss12GA    | ATATTTTATGTAGTTAACT           | 19 | PGSC0003DMG400006382 | low    |
| stu-miR7996a_1ss24AG        | ATGTGGTACATATGAAATTTGAAG      | 24 | JH137859.1           | low    |
| stu-miR7997a_L-1R+1_1ss4CT  | TGTTGCTCGGACTCTTCAAAA         | 21 | PGSC0003DMG400001464 | low    |
| stu-MIR7997a-p3_1ss8GT      | AGAGAGTTCGAGCAACATA           | 19 | PGSC0003DMG400001464 | low    |
| stu-MIR7997b-p5             | CTCGGACTCTTCAAAAATGTC         | 21 | PGSC0003DMG400003300 | low    |
| stu-MIR7997b-p3_2ss19TC20TC | AGTGTAATTTTGGAGAATCCGACA      | 24 | PGSC0003DMG400003300 | low    |
| stu-miR7997c_L-3R-3         | TTGCTCGGACTCTTCAAAA           | 18 | PGSC0003DMG400027276 | low    |
| stu-MIR7997c-p3_2ss7GA17GA  | TTTTTGAAGAGTCCGAACAAC         | 21 | PGSC0003DMG400027276 | middle |
| stu-miR7998_1ss22AG         | ACGGACCGTAGATCAATCCACGGT      | 24 | JH137796.1           | low    |
| stu-miR7999-3p_R-1_1ss21CT  | ACGACCCGTAGAACTGCCCATGA       | 23 | JH137869.1           | low    |
| stu-miR8000_1ss13TC         | ACACCGAAGAACCGACACCGAAG<br>A  | 24 | JH137869.1           | low    |
| stu-MIR8001b-p5             | GGGATTAGTATGAAAAATTTGCAGG     | 24 | PGSC0003DMG400009313 | middle |
| stu-MIR8001b-p3             | AATAAGTTTCCTGCGGATTTTCAT      | 24 | PGSC0003DMG400009313 | low    |
| stu-MIR8001a-p5_2ss9TC19TC  | ATGAAAAATCCGAGGAACTTATT       | 24 | PGSC0003DMG400003848 | low    |
| stu-MIR8001a-p3_2ss17TC20TC | AAATTTTCATACTAATCCCCAGAA      | 24 | PGSC0003DMG400003848 | low    |
| stu-miR8004_1ss6TC          | AGGGGCTGTGTATGTGTTTGGCCT      | 24 | JH137887.1           | low    |
| stu-MIR8006-p3_1ss5TG       | AATGGCCCCAAAAGTATGACGGAG<br>G | 24 | PGSC0003DMG400007511 | low    |
| stu-MIR8006-p5_1ss9AT       | TACTTTTGTGACATTGGTGCC         | 21 | PGSC0003DMG400015460 | low    |
| stu-MIR8006-p3_1            | AATGTCCCAAAAAGTATGACGGAG<br>G | 24 | PGSC0003DMG400015460 | middle |
| stu-MIR8006-p5_1ss11AG      | CATACTTTTGGGACATTG            | 18 | PGSC0003DMG400022933 | low    |
| stu-MIR8006-p3_2            | ACCAATGTCCCAAAAAGTATGACGG     | 24 | PGSC0003DMG400022933 | middle |
| stu-MIR8006-p5_2ss11TC21AG  | AAATATACCCCTAAACTATCGTAA      | 24 | PGSC0003DMG400006606 | low    |
| stu-MIR8006-p3_1ss13CA      | GACGGAGGGTATATGCATACCATT      | 24 | PGSC0003DMG400006606 | low    |
| stu-MIR8006-p5_1ss8TC       | TACCCTCCGTCATACTTTTGAGAC      | 24 | PGSC0003DMG400022933 | low    |
| stu-miR8006-5p_2ss14AG17GC  | TAGTTTTTGGACGGCACGGGCACC      | 24 | PGSC0003DMG400022933 | low    |
| stu-MIR8006-p3_1ss19CT      | TATGACGGAGGGTATCTGTATACC      | 24 | PGSC0003DMG400006606 | low    |
| stu-MIR8007b-p5             | ATTCAAACAAGTCTATCTTTGACC      | 24 | PGSC0003DMG401016214 | middle |
| stu-MIR8007b-p3_2ss22AG23TC | AAACTGTTTGACTCTCGAAAAGC<br>G  | 24 | PGSC0003DMG401016214 | middle |
| stu-miR8007b-5p_1ss6AG      | ATGTGGCACTTTTTGAATTTTCGAG     | 24 | JH138003.1           | middle |
| stu-miR8007a-5p_1ss21TC     | ATGTGGCACTTTTCGGATTTCGAG      | 24 | PGSC0003DMG400003820 | middle |
| stu-MIR8007a-p3             | ACTTAAACTGTTTGACTCTCGAAA      | 24 | PGSC0003DMG400003820 | middle |
| stu-MIR8008b-p5_2ss17CT18TC | AGCGACGGACAGTGTCTCTTAGTC      | 24 | PGSC0003DMG400014002 | low    |
| stu-miR8008a_2ss22AG24TC    | ATTTCCAGAAAAGCGACGGACGG<br>C  | 24 | JH137941.1           | middle |
| stu-MIR8008b-p5_2ss17CT18TC | AGCGACGGACAGTGTCTCTTAGTC      | 24 | PGSC0003DMG400045412 | low    |
| stu-miR8008a_2ss22AG24TC    | ATTTCCAGAAAAGCGACGGACGG<br>C  | 24 | JH137951.1           | middle |
| stu-miR8008b_1ss24TC        | AAACCCAGAAAAGCGACGGACAG<br>C  | 24 | PGSC0003DMG400035133 | low    |

|                                   |                              |    |                      |        |
|-----------------------------------|------------------------------|----|----------------------|--------|
| stu-miR8010_1ss17AG               | ATAGGACCCTAGTTAAGTTTAGGT     | 24 | JH137951.1           | low    |
| stu-miR8011b-3p_R-1               | TTCGTGAGACAAAAAGAAGCC        | 21 | PGSC0003DMG400018840 | low    |
| stu-miR8011a-3p_L-1_1ss13CT       | ATAAAAAGAAGTCTCACACAAC       | 23 | PGSC0003DMG400025795 | low    |
| stu-miR8011a-5p                   | TTGTGTGAGGTTTCTTTTGTTC       | 24 | JH137959.1           | low    |
| stu-miR8011a-3p_1ss13CT           | AATAAAAAGAAGTCTCACACAAC<br>T | 24 | JH137959.1           | middle |
| stu-miR8013_1ss9AT                | AGAAGAAATTCGCTCCGTCAGAA<br>G | 24 | JH137968.1           | low    |
| stu-miR8014-3p_1ss21AG            | ATGAATACAATGTTTGGATAGATT     | 24 | JH137984.1           | low    |
| stu-miR8015-5p                    | TATTGGATATTGAAAATGAACTT      | 24 | JH138004.1           | low    |
| stu-miR8015-3p                    | GTTTCATTTTCAAGGTCCAATAGC     | 24 | JH138004.1           | low    |
| stu-miR8016                       | ATTTTGAATGGAAGGCCCATGTG      | 24 | PGSC0003DMG400027950 | middle |
| stu-miR8019-3p_L+1R-1_1ss2AC      | ACAAAGAATGACCTGGTTGACTT      | 24 | JH138030.1           | middle |
| stu-miR8020                       | AATTTCAATTGAGTATGTTGTGTT     | 24 | PGSC0003DMG400011352 | middle |
| stu-MIR8020-p3                    | CAACAACAACATACTACTGAAA       | 23 | PGSC0003DMG400011352 | low    |
| stu-miR8023_1ss9AT                | TTTGGCACTATTTCATTGGCAACC     | 24 | PGSC0003DMG400020694 | middle |
| stu-miR8023_2ss9AT19GA            | TTTGGCACTATTTCATTGACAACC     | 24 | JH138103.1           | low    |
| stu-miR8023                       | TTTGGCACAAATTCATTGGCAACC     | 24 | PGSC0003DMG400022355 | middle |
| stu-miR8025-5p                    | ACATACTCGACATGCAATTAAATT     | 24 | JH138169.1           | middle |
| stu-miR8025-3p_1ss13CG            | TTTAATTGCATGGCAAGTGTGTGG     | 24 | JH138169.1           | middle |
| stu-miR8026_1ss10AG               | ATGTAGAGAGTATGTGGTAACCCCT    | 24 | JH138175.1           | low    |
| stu-MIR8026-p5                    | AGAGAATATGTGGTAACCCTAATG     | 24 | PGSC0003DMG400026828 | middle |
| stu-MIR8026-p3_2ss13GT20AG        | AGAGGTTATGACTTAATCTGGTAC     | 24 | PGSC0003DMG400026828 | low    |
| stu-miR8028-5p                    | TCCTTATGCTACAATTGTGAACAA     | 24 | PGSC0003DMG400004445 | low    |
| stu-MIR8028-p3_3ss9AC18TC20<br>CG | AAGAGAAGCATGTTTATCGGA        | 21 | PGSC0003DMG400004445 | low    |
| stu-miR8030-5p_1ss2TC             | TCGGGTTGGTTTGGTCTCGGGTT      | 23 | PGSC0003DMG400007733 | middle |
| stu-miR8032b-3p_L+1_1ss23GT       | TAGTGTGAGTCGGTGCATTAGT       | 23 | JH137885.1           | low    |
| stu-miR8032a-5p                   | TGGTCGGCATGACTCCCGAGGT       | 22 | PGSC0003DMG400040360 | middle |
| stu-MIR8032b-p3_1ss24GC           | AGGTTTTAGTGTGAGTCGGTGCC      | 24 | PGSC0003DMG400040360 | middle |
| stu-miR8032a-5p                   | TGGTCGGCATGACTCCCGAGGT       | 22 | PGSC0003DMG400024511 | middle |
| stu-MIR8032d-p3                   | TCCCGAGGTTTTAGTGTGAGT        | 22 | PGSC0003DMG400024511 | low    |
| stu-miR8033-5p_R-1                | TTCCAAAGCTGCAGAAATGAG        | 21 | PGSC0003DMG402002797 | low    |
| stu-miR8033-3p_L-1_1ss17AG        | CAATTCTGCAGCTTTGGGAGT        | 21 | PGSC0003DMG402002797 | middle |
| stu-miR8036-3p                    | TATGTCTTCCGATGCCCTCCCA       | 22 | JH138005.1           | high   |
| stu-miR8038a-3p_L+1               | AGTTCAACTTGCTCACTTGGAG       | 22 | JH138051.1           | low    |
| stu-miR8039_L-1R+4_1ss4CA         | TTACTATCTGAACATATACCATCT     | 24 | PGSC0003DMG400017863 | low    |
| stu-miR8041a-3p                   | ATGATGTATAGCAAAGAGCCT        | 21 | JH138202.1           | middle |
| stu-MIR8042-p5_1ss21TC            | TAAGCACTTCCGTCTAATTTC        | 21 | PGSC0003DMG400022361 | middle |
| stu-miR8044-5p                    | TTTCAAATATGGTTGGAGATG        | 21 | JH137893.1           | middle |
| stu-miR8044-3p                    | TCTCCAGCGATATTGAAACT         | 21 | JH137893.1           | middle |
| stu-miR8045                       | ATTGATAGTTGAGGTGTGTTT        | 21 | PGSC0003DMG400007859 | low    |
| stu-MIR8047-p5                    | TTCGAAATTAGACCCGTGGTT        | 21 | PGSC0003DMG400028818 | low    |
| stu-miR8048-5p_R+3                | CTCATTAGCATCTCCATCTTGATC     | 24 | JH138031.1           | low    |

|                       |                          |    |                      |     |
|-----------------------|--------------------------|----|----------------------|-----|
| stu-miR8049-5p_L-2R+5 | AGGCTCATGCAGACATGCACTAGA | 24 | JH138095.1           | low |
| stu-miR8049-3p        | CATGTCTACATGAGCCTGATA    | 21 | JH138095.1           | low |
| stu-miR8050-3p_L+1    | TTGACTTGAGATTCTACTTGG    | 22 | PGSC0003DMG400001496 | low |

Note :miR\_name: miRNA name, L-n indicates that the left side of the mirNA is missing n bases,R-n indicates that the right side of the reported microRNA is missing n bases, L+n indicates that the left end of the reported microRNA has n extra bases, R+n represents more than n bases at the right end of the reported microRNA. 2ss5TC13TA represents the substitution of C at the fifth base and A at the 13th base, making a total of two substitutions. Use "-3p" and "-5p" as suffixes to distinguish the two sequences. "-p3" and "-p5" are located at the arm end. miR-seq: mature sequence of miRNA; len: Maturity length of miRNA; Genome ID: chromosome name of miRNA precursor sequence corresponding to mature miRNA; Expression level: high, medium and low expression level. low is the miRNA whose copy number is less than 10 in all samples. Intermediate refers to mirnas whose copy number in a sample is greater than 10 and smaller than the average copy number in all samples (total copy number /(number of samples x total number of mirnas)). High refers to the miRNA whose copy number in the sample is larger than the average.
