# Supplementary material
Source: MDPI journal article supplement (https://www.mdpi.com/2073-4395/13/12/2942)
Supplement: s1 [file s1]

**Table S3.** Statistics of differentially expressed mirnas in potato

| miR_name                    | miR_seq                   | up/down | log2(fold_change) | pvalue   |
|-----------------------------|---------------------------|---------|-------------------|----------|
| stu-miR6024-5p              | AGAAACAACACTTGCTAAAAGA    | down    | -4.13             | 0.000000 |
| stu-miR8044-5p              | TTTCAAATATGGTTGGAGATG     | down    | -3.38             | 0.000009 |
| stu-miR8020                 | AATTCATTGAGTATGTTGTTGTT   | down    | -3.23             | 0.000056 |
| stu-MIR8006-p3_1            | AATGTCCCAAAAAGTATGACGGAGG | down    | -3.21             | 0.000056 |
| stu-MIR8006-p3_2            | ACCAATGTCCCAAAAAGTATGACGG | down    | -3.21             | 0.000056 |
| stu-miR171b-3p              | TTGAGCCGCGTCAATATCTCT     | down    | -3.01             | 0.000000 |
| stu-miR167d-3p_L+2          | CAGATCATGTGGTTGCTTCACC    | down    | -2.72             | 0.000000 |
| stu-miR8023                 | TTTGGCACAATTTTCATTGGCAACC | down    | -2.61             | 0.000000 |
| stu-miR8011a-3p_1ss13CT     | AATAAAAAAGAAGTCTCACACAAC  | down    | -2.38             | 0.000000 |
| stu-miR8023_1ss9AT          | TTTGGCACTATTTTCATTGGCAACC | down    | -2.31             | 0.001165 |
| stu-miR8008a_2ss22AG24TC    | ATTTCCAGAAAAGCGACGGACGGC  | down    | -2.05             | 0.041512 |
| stu-miR477a-5p              | CCTCTCCCTCAAGGGCTTCTC     | down    | -1.94             | 0.000000 |
| stu-miR172a-3p              | AGAATCTTGATGATGCTGCAT     | down    | -1.94             | 0.000000 |
| stu-miR8041a-3p             | ATGATGTATAGCAAAGAGCCT     | down    | -1.88             | 0.001666 |
| stu-miR477b-5p              | ACTCTCCCTCAAAGGCTTCTG     | down    | -1.84             | 0.000000 |
| stu-miR391-5p_L-1R+2        | ACGCAGGAGAGATGATGCTGGA    | down    | -1.77             | 0.000000 |
| stu-miR6149-3p              | TGATTCAGGTTTGATGCAAAC     | down    | -1.72             | 0.046580 |
| stu-miR5303g_L-3_1ss19AG    | TTTTTGAAGAGTCTGGGCAAC     | down    | -1.71             | 0.046580 |
| stu-miR7122-5p              | TTATACAGAGAAACCGTGTCG     | down    | -1.67             | 0.002838 |
| stu-MIR162a-p3              | AAGCGATCGATAAACCTCTGCATC  | down    | -1.65             | 0.000000 |
| stu-miR8044-3p              | TCTCCAGCGATATTTGAAACT     | down    | -1.58             | 0.000000 |
| stu-miR8016                 | ATTTTGAATGGAAGGCCCATGTG   | down    | -1.50             | 0.000463 |
| stu-miR167b-3p_L+4          | ATCAGATCATGTGGCAGCATCACC  | down    | -1.47             | 0.000000 |
| stu-MIR1886a-p3_1ss15TC     | ATTTTACGCTGATTCCATCTCATG  | down    | -1.42             | 0.000594 |
| stu-MIR7997c-p3_2ss7GA17GA  | TTTTTGAAGAGTCCGAACAAC     | down    | -1.40             | 0.000845 |
| stu-miR6149-5p              | TTGCAACACACCTGAATCGTC     | down    | -1.34             | 0.000000 |
| stu-MIR8007a-p3             | ACTTAACTGTTTGACTCTCGAAA   | down    | -1.34             | 0.000005 |
| stu-miR162a-5p_L+1          | TGGAGGCAGCGGTTTCATCGATC   | down    | -1.33             | 0.000000 |
| stu-miR482a-3p              | TTTCCAATTCCACCCATTCTTA    | down    | -1.23             | 0.000000 |
| stu-MIR7985-p3_1ss14GA      | AGCTCGTCGCACCAGGCTTGCC    | down    | -1.12             | 0.015864 |
| stu-MIR7984b-p5_1ss2TG      | AGGACCTTTTACCCCTGCACTATT  | down    | -1.09             | 0.000272 |
| stu-MIR7984d-p5_1ss6AC      | AGGACCTTTTACCCCTGCACTATT  | down    | -1.09             | 0.000272 |
| stu-MIR8007b-p5             | ATTCAAACAAGTCTATCTTTGACC  | down    | -1.08             | 0.010939 |
| stu-miR8036-3p              | TATGTCTTTCCGATGCCTCCCA    | down    | -1.07             | 0.000000 |
| stu-miR171b-5p_1ss12TC      | AGATATTGATGCGGCTCAATC     | down    | -inf              | 0.004274 |
| stu-miR3627-5p              | TCGCAGGAGAGATGGCACTTAG    | down    | -inf              | 0.000078 |
| stu-miR6026-5p_1ss12TA      | AATACAACATATAGCCAAGACAA   | down    | -inf              | 0.000295 |
| stu-miR8000_1ss13TC         | ACACCGAAGAACCGACACCGAAGA  | down    | -inf              | 0.016480 |
| stu-MIR8001a-p3_2ss17TC20TC | AAATTTTCATACTAATCCCCAGAA  | down    | -inf              | 0.032469 |

|                             |                           |      |       |          |
|-----------------------------|---------------------------|------|-------|----------|
| stu-MIR8006-p5_1ss11AG      | CATACTTTTGGGACATTG        | up   | inf   | 0.024060 |
| stu-miR8006-5p_2ss14AG17GC  | TAGTTTTTGGACGGCACGGGCACC  | down | -inf  | 0.004274 |
| stu-miR8007b-5p_1ss6AG      | ATGTGGCACTTTTGAATTTTCGAG  | down | -inf  | 0.000295 |
| stu-miR8025-5p              | ACATACTCGACATGCAATTAAATT  | down | -inf  | 0.000000 |
| stu-MIR8032b-p3_1ss24GC     | AGGTTTTTCAGTGTGAGTCGGTGCC | down | -inf  | 0.000000 |
| stu-miR530_L-2R+2           | TGCATTTGCACCTGCACCTTA     | up   | 1.00  | 0.000000 |
| stu-miR397-3p_R-2           | CATCAACGCTACACTCAAT       | up   | 1.11  | 0.000001 |
| stu-miR397-5p_1ss17AG       | ATTGAGTGCAGCGTTGGTGAC     | up   | 1.25  | 0.020057 |
| stu-miR408a-3p              | TGCACAGCCTCTTCCCTGGTT     | up   | 1.52  | 0.000000 |
| stu-MIR8001b-p5             | GGGATTAGTATGAAAATTTGCAGG  | up   | 1.60  | 0.022609 |
| stu-miR827-5p               | TTTGTGTATGGTCATCTATTC     | up   | 1.69  | 0.002803 |
| stu-miR8010_1ss17AG         | ATAGGACCCTAGTTAAGTTTAGGT  | up   | 1.79  | 0.048672 |
| stu-miR319-3p_L+1R-1_1s17CT | CTTGGA CTGAAGGGTTTCCTT    | up   | 2.00  | 0.000000 |
| stu-miR408b-3p              | TGCACTGCCTCTTCCCTGGCT     | up   | 2.05  | 0.000000 |
| stu-miR398a-3p              | TATGTTCTCAGGTCGCCCCCTG    | up   | 2.13  | 0.000000 |
| stu-miR398a-5p              | GGGTTGATTTGAGAACATATG     | up   | 2.98  | 0.000000 |
| stu-MIR319-p5_1ss18CT       | TGCTGCTGAATCATTGGTTC      | up   | 3.00  | 0.000000 |
| stu-MIR5303j-p5_2ss10GT17CT | ATTCAAATTTCTGCCCTA        | up   | 4.60  | 0.000000 |
| stu-miR166a-5p_1ss1GN       | NGAATGTTGTCTGGCTCGAGG     | up   | 7.20  | 0.024060 |
| PC-3p-74531_17              | AAAAATCCCCATGTAATTCACAGT  | down | -3.88 | 0.000105 |
| PC-3p-28523_59              | TTATTTTCACCTGACAAGACT     | down | -3.63 | 0.000646 |
| PC-5p-94557_13              | AGCGACGGACAACGTCTCTTTGTC  | down | -3.26 | 0.003919 |
| PC-3p-117522_10             | AACGACATAGATGAGCCAACTTT   | down | -2.78 | 0.000936 |
| PC-3p-51799_27              | AAGAAGAGTGAGATGAAGTCT     | down | -2.61 | 0.041258 |
| PC-5p-82220_15              | TTCTAGGATATAAATTGCACTACT  | down | -2.53 | 0.004925 |
| PC-5p-65932_20              | TAAAGGCTTCCTTGAGGCACC     | down | -2.05 | 0.041512 |
| PC-5p-42915_35              | TTTTACACGTGGCCAATTATAATT  | down | -1.91 | 0.000000 |
| PC-5p-138631_8              | TCAACTATCCAGTCTTTCCTCAGA  | down | -1.76 | 0.030368 |
| PC-3p-41009_37              | ATAATTGGCCACGTGTA AAAAATG | down | -1.42 | 0.003941 |
| PC-3p-25777_66              | ATCACTACCATCAACATTGT      | down | -1.25 | 0.005612 |
| PC-5p-27109_63              | GACGAGTGAGGCTTGCTCAGTTGG  | down | -1.04 | 0.007960 |
| PC-3p-230042_5              | CAAGGCTAGGACAGATGGAAAGAA  | down | -inf  | 0.008384 |
| PC-3p-134074_9              | ATAGTTCAAGTAGAAAAAGGGAAT  | down | -inf  | 0.016480 |
| PC-5p-119431_10             | TCTTAGGCCTAATTCACACCC     | down | -inf  | 0.008384 |
| PC-3p-37841_41              | GATAGTGCAGGTAGGAACTCACA   | down | -inf  | 0.000011 |
| PC-5p-160083_7              | GTTGAACAAGTAGACACATGAGCC  | down | -inf  | 0.000040 |
| PC-5p-61065_22              | AAAGTGGACAACATAAAAAGGGACG | down | -inf  | 0.000295 |
| PC-3p-122052_10             | AAAACAAC TCACTTCAAGCCT    | down | -inf  | 0.016480 |
| PC-3p-178233_6              | AAAGCGACATCCGGAGGTCGGTAT  | down | -inf  | 0.000574 |
| PC-5p-137760_8              | TGTTCTTGTGGTTTCTTGGA      | down | -inf  | 0.032469 |

|                 |                          |      |      |          |
|-----------------|--------------------------|------|------|----------|
| PC-3p-179656_6  | AGTTGTCAGTTGAGACCAAGTTGA | down | -inf | 0.032469 |
| PC-3p-206768_6  | GTTGACACCTAATTTTGACCCGCC | down | -inf | 0.000295 |
| PC-5p-107179_11 | GAGTTTCCTACCTGAACTATCACC | up   | 1.93 | 0.009480 |
| PC-5p-656396_2  | ACTTCCTGATCACATGGCGACAAC | up   | 2.28 | 0.017658 |
| PC-3p-291253_4  | TAAGGTAGGGCGCTCTTCGA     | up   | 4.60 | 0.000005 |

---
