# Supplementary material
Source: MDPI journal article supplement (https://www.mdpi.com/2073-4395/13/12/2942)
Supplement: s1 [file s1]

**Table S2.** Number of known miRNAs in each miRNA family

| Number | miR_name        | miR_seq                  | Length |
|--------|-----------------|--------------------------|--------|
| 1      | PC-5p-566198_3  | TTGCGCGTTGAATATATCTCATA  | 24     |
| 2      | PC-3p-3277_519  | CTATGAGATAAGTTCAATGCG    | 21     |
| 3      | PC-5p-566198_3  | TTGCGCGTTGAATATATCTCATA  | 24     |
| 4      | PC-3p-3277_519  | CTATGAGATAAGTTCAATGCG    | 21     |
| 3      | PC-5p-5426_338  | AGACTTCATCTCACTCTTCTT    | 21     |
| 4      | PC-3p-51799_27  | AAGAAGAGTGAGATGAAGTCT    | 21     |
| 5      | PC-5p-5426_338  | AGACTTCATCTCACTCTTCTT    | 21     |
| 6      | PC-3p-51799_27  | AAGAAGAGTGAGATGAAGTCT    | 21     |
| 5      | PC-5p-442080_3  | TTCGTGCCAAAATTCTGTCTTGCC | 24     |
| 7      | PC-3p-416231_3  | TTGGCAAGACAAAATTTTGGCACG | 24     |
| 8      | PC-5p-442080_3  | TTCGTGCCAAAATTCTGTCTTGCC | 24     |
| 9      | PC-3p-131930_9  | TTGGCAAGACAGAATTTTGGCACG | 24     |
| 8      | PC-5p-258064_5  | TTGCTCGGATCCTCCAAGAATG   | 22     |
| 10     | PC-3p-103168_12 | TTTTTGAAGGATCCGAACAAC    | 21     |
| 10     | PC-5p-258064_5  | TTGCTCGGATCCTCCAAGAATG   | 22     |
| 11     | PC-3p-57804_24  | TTCTTGCTACATATCTCTTGC    | 21     |
| 12     | PC-3p-57804_24  | TTCTTGCTACATATCTCTTGC    | 21     |
| 13     | PC-5p-2975816_1 | AAGAAAAGTGTGAATTACATGGGG | 24     |
| 14     | PC-3p-510630_3  | GAAAATCTCCATGTAATTCACAGT | 24     |
| 15     | PC-5p-600084_2  | TTTATCCCCGAATATTGACAGC   | 24     |
| 16     | PC-3p-137220_8  | AAGGCTGTCAATAGTTCGGGGATG | 24     |
| 17     | PC-5p-166959_7  | AGCCTATGCCCAAAATCCCTAAGA | 24     |
| 18     | PC-3p-324348_4  | AGGGATTTTGGGCATAGGCTG    | 21     |
| 19     | PC-5p-956651_2  | ACTTGATAAAAGTTGAACATGTAG | 24     |
| 20     | PC-3p-2422791_1 | TTGTTCAACTTTGTACATGTT    | 21     |
| 21     | PC-5p-442534_3  | TACTCGGATGTCACACAATAATT  | 24     |
| 22     | PC-3p-239053_5  | TGTGTGACATCCGAGTAGGTA    | 21     |
| 23     | PC-5p-122410_10 | ACCAACTATTTATGAAAACACACC | 24     |
| 24     | PC-3p-2306787_1 | GTGTTGTGATAAATAATTGGTGAT | 24     |
| 25     | PC-5p-2233463_1 | ATTGAACAAGTAAACACACACGTC | 24     |
| 26     | PC-3p-2647257_1 | GACGGATGTGTCTATTTGTTCAAA | 24     |
| 27     | PC-5p-593725_2  | AAGTTTGGCTCATCTATAACATTT | 24     |
| 28     | PC-3p-117522_10 | AACGACATAGATGAGCCAAACTTT | 24     |
| 29     | PC-5p-77773_16  | TCCGTAAAAAGTTTGGCTCATC   | 22     |
| 30     | PC-3p-564472_3  | AAATGAATCAAACTTTAAACGGAT | 24     |
| 31     | PC-5p-172881_7  | TCATCTACCCCAAATAAAGCAAGC | 24     |
| 32     | PC-3p-191680_6  | TTGCTTTATTTGGGGTAGATGAGC | 24     |
| 33     | PC-5p-235616_5  | TCCTCATGCCTTGCATCTAAATTC | 24     |
| 34     | PC-3p-518150_3  | ATTTAGATGTAGGGAGTAAGGGCG | 24     |
| 35     | PC-5p-118544_10 | AGCGACGGACAACGTCTCTATGTC | 24     |
| 35     | PC-3p-725238_2  | AAGAGATACTGTCCGTCGCTTTCT | 24     |
| 36     | PC-5p-69490_19  | TTTCATACTGAACTATCACC     | 20     |

|    |                 |                           |    |
|----|-----------------|---------------------------|----|
| 37 | PC-5p-69490_19  | TTTCATACTGAACTATCACC      | 20 |
| 38 | PC-5p-223762_5  | ATTACATGGAGATTTTCTGGGGA   | 24 |
| 39 | PC-3p-229353_5  | AGGAAAATCCCATGTAATTCACC   | 24 |
| 40 | PC-5p-1136616_2 | ATACAAAGTTGCTAGGTAAAAAA   | 24 |
| 41 | PC-3p-206478_6  | TTAACTTGGTAACTTTGTATTGT   | 23 |
| 42 | PC-5p-368447_3  | TTACCCCTTTTCGGCATACGTGGC  | 24 |
| 43 | PC-3p-1418814_1 | AGTGCAACGTAGGCCGAAAAGGGGT | 25 |
| 44 | PC-5p-138900_8  | GAAAATTCCCATGTAATTCACACT  | 24 |
| 45 | PC-3p-2138155_1 | AAAGTGTGAATTATATGGGGATT   | 23 |
| 46 | PC-5p-82220_15  | TTCTAGGATATAAATTGCACTACT  | 24 |
| 47 | PC-3p-260109_5  | AAGTAGTGCAATTTATCTCCTAGA  | 24 |
| 48 | PC-5p-131380_9  | ATTCACCTTAGTGGTCCCAACCC   | 24 |
| 49 | PC-3p-353674_4  | TTGGGACCAGTAAAGTGAAATCT   | 23 |
| 50 | PC-5p-2400398_1 | TGTTTCGAGTCATGGGAATAGA    | 21 |
| 50 | PC-3p-67357_20  | TATTCCTCATGACTCGAACACC    | 21 |
| 51 | PC-5p-257946_5  | TTTCTCAGATGTTCACTCAACT    | 22 |
| 52 | PC-5p-257946_5  | TTTCTCAGATGTTCACTCAACT    | 22 |
| 53 | PC-5p-240592_5  | AATTACATGGGGATTTTCCTGGGA  | 24 |
| 54 | PC-3p-74531_17  | AAAAATCCCATGTAATTCACAGT   | 24 |
| 55 | PC-5p-917769_2  | TCAGCGTCATGGACAACAACATC   | 23 |
| 56 | PC-3p-514755_3  | TTGTTATTGTCTATGATGCTGAAA  | 24 |
| 57 | PC-5p-1367113_1 | AAGAAAGTGTGAATTACATGGGAA  | 24 |
| 58 | PC-3p-399900_3  | AAATTCTCATGTAATTCACACTT   | 23 |
| 59 | PC-5p-1694243_1 | TTCTCATTTCTTCTAGCCTTAGT   | 23 |
| 60 | PC-3p-230042_5  | CAAGGCTAGGACAGATGGAAAGAA  | 24 |
| 61 | PC-5p-313878_4  | AAAGTTGAACAAGTAGACACATGT  | 24 |
| 62 | PC-3p-492668_3  | ACACATGTGTCTATTTGTTTCAGCT | 24 |
| 63 | PC-5p-1219204_1 | TTCCCTTTTCTACCTGAACTATC   | 24 |
| 64 | PC-3p-134074_9  | ATAGTTCAAGTAGAAAAAGGGAAT  | 24 |
| 65 | PC-5p-234009_5  | AGGTATGGTCACTCAACTAATAGT  | 24 |
| 66 | PC-3p-1185207_2 | ATTAATTGAGTGACTATCTGAGAT  | 24 |
| 67 | PC-5p-119431_10 | TCTTAGGCCTAATTCACACCC     | 21 |
| 68 | PC-3p-563439_3  | ATGTGAGTTAGGCTCAAGACC     | 21 |
| 69 | PC-5p-161745_7  | TGAGTTTTCTGTCTGAACTAGCAC  | 24 |
| 70 | PC-3p-37841_41  | GATAGTGCAGGTAGGAAACTCACA  | 24 |
| 71 | PC-5p-42915_35  | TTTTACACGTGGCCAATTATAATT  | 24 |
| 72 | PC-3p-41009_37  | ATAATTGGCCACGTGTAAAAAATG  | 24 |
| 73 | PC-5p-275977_4  | CCTTGATTAGAACACACCTC      | 21 |
| 74 | PC-3p-1990253_1 | TGAGGTGTGCTTTAATACAAA     | 21 |
| 75 | PC-5p-754603_2  | TATCCTCGTTATAAAAGTGGCTCA  | 24 |
| 75 | PC-3p-220153_5  | ATGTGAGCCACTTTTATAACGAGG  | 24 |
| 76 | PC-3p-28523_59  | TTATTTTCACCTGACAAGACT     | 21 |
| 77 | PC-3p-28523_59  | TTATTTTCACCTGACAAGACT     | 21 |
| 78 | PC-5p-355193_4  | AGTGAGTTTCCTACCTGAACTATC  | 24 |

|     |                 |                           |    |
|-----|-----------------|---------------------------|----|
| 79  | PC-3p-2389269_1 | GATAGTTCAGATAGGAACTCACA   | 24 |
| 80  | PC-5p-160083_7  | GTTGAACAAGTAGACACATGAGCC  | 24 |
| 81  | PC-3p-319202_4  | ACGCGTGTGTCTATTGTTCAACT   | 24 |
| 82  | PC-5p-82548_15  | TTATGTAAGCTTCCACATGGC     | 21 |
| 83  | PC-3p-139919_8  | TTTTGCCATGTGAAAGCTTACA    | 22 |
| 84  | PC-5p-199033_6  | AATTCAACCACCTTGCAAGCT     | 21 |
| 85  | PC-3p-906988_2  | TTGCAAGTTGGTTGAATTTCT     | 21 |
| 86  | PC-5p-1380183_1 | ATTTCTCAGATGATCACTCAACT   | 23 |
| 87  | PC-3p-152254_8  | ATTAGTTGAGTGACCATCTGAGAA  | 24 |
| 88  | PC-5p-34936_46  | ATCCGTTAAAAGTTTGCTCATCT   | 24 |
| 89  | PC-5p-133749_9  | GAGTTTCATACCTGAACTATCACC  | 24 |
| 90  | PC-5p-122250_10 | TATAAATATTATTGCTTGCTTGCT  | 24 |
| 91  | PC-5p-61065_22  | AAAGTGGACAATAAAAAGGGACG   | 24 |
| 92  | PC-3p-291253_4  | TAAGGTAGGGCGCTCTTCGA      | 20 |
| 93  | PC-3p-308222_4  | ATGCCAAGTAGGATGCGTGTGTCT  | 24 |
| 94  | PC-5p-656396_2  | ACTTCTGATCACATGGCGACAAC   | 24 |
| 95  | PC-5p-107179_11 | GAGTTTCCTACCTGAACTATCACC  | 24 |
| 96  | PC-3p-146263_8  | ACCTGTTGACATTTTGAAGAGTC   | 24 |
| 97  | PC-3p-3822_455  | ATCTCTCTCAATGATTGGCTCATC  | 24 |
| 98  | PC-3p-690085_2  | AATAAAATAGATGAGCCAAACTTT  | 24 |
| 99  | PC-3p-122052_10 | AAAACAACCTCACTTCAAGCCT    | 21 |
| 100 | PC-3p-71805_18  | ATTTGACTATTCCTGTAATCTCC   | 24 |
| 101 | PC-5p-214804_5  | AATCTTATCCATCGATCCGACATT  | 24 |
| 102 | PC-3p-178233_6  | AAAGCGACATCCGGAGGTCGGTAT  | 24 |
| 103 | PC-5p-116171_10 | ATCCTTATGCTACAATTGTGAACA  | 24 |
| 104 | PC-3p-127856_9  | AAAAGTCATATACACCATAGCAGG  | 24 |
| 105 | PC-5p-244984_5  | AAATTTTTTACAATGGTAGAGGCC  | 24 |
| 106 | PC-3p-150929_8  | TGTAGTACGTAATGAAGAGCCT    | 22 |
| 107 | PC-3p-25777_66  | ATCACTACCATCAACATTGT      | 20 |
| 108 | PC-5p-137760_8  | TGTTCTTGTGGTTTCTTGGA      | 21 |
| 109 | PC-5p-94557_13  | AGCGACGGACAACGTCTCTTTGTC  | 24 |
| 110 | PC-3p-69496_19  | TGTCTGGATGAAACCTCGTGG     | 21 |
| 111 | PC-3p-529897_3  | ATAAAAACTATTAGCTGAGTGACC  | 24 |
| 112 | PC-5p-264647_4  | TCATCCACCATACTCTGACGC     | 21 |
| 113 | PC-3p-308917_4  | AGAAAATGATTGTTATACAGAGGT  | 24 |
| 114 | PC-3p-231121_5  | ATGTGTCTACTTGTTCAACTTTAT  | 24 |
| 115 | PC-5p-227023_5  | TAAAACGTGCCTCAGAGTAACA    | 22 |
| 116 | PC-3p-241087_5  | AAGTAGCAGACTCTTGACAACATG  | 24 |
| 117 | PC-5p-138631_8  | TCAACTATCCAGTCTTCCTCAGA   | 24 |
| 118 | PC-5p-307688_4  | ATCTGTTAAAAGTTTGCTCATC    | 23 |
| 119 | PC-5p-27109_63  | GACGAGTGAGGCTTGCTCAGTTGG  | 24 |
| 120 | PC-3p-228755_5  | ATAGGACGTGTGTGTCTACTTGT   | 24 |
| 121 | PC-5p-414422_3  | TTTCTCCGTTCATTTTTAATTGTC  | 24 |
| 122 | PC-3p-508513_3  | GTTTGGTTCGGATTGCGGTTCCGGT | 24 |

|     |                 |                           |    |
|-----|-----------------|---------------------------|----|
| 123 | PC-3p-196589_6  | TTGATGTGCCCTTTTGAATT      | 21 |
| 124 | PC-5p-148437_8  | AATTTCTGTCAACTAGTCAACATC  | 24 |
| 125 | PC-3p-158843_7  | AGTATAACTTGTCACCAACCAAAC  | 24 |
| 126 | PC-5p-392695_3  | TTACCCCTGCACTATTTAATAGT   | 24 |
| 127 | PC-5p-302520_4  | TTTCCCTATGAAAACGCTGCC     | 22 |
| 128 | PC-3p-164394_7  | AAACTGTTTATATTGATG        | 18 |
| 129 | PC-3p-179656_6  | AGTTGTCAGTTGAGACCAAGTTGA  | 24 |
| 130 | PC-5p-175471_6  | AGTTGAACAAGTAGACACACACGT  | 24 |
| 131 | PC-5p-65932_20  | TAAAGGCTTCCTTGAGGCACC     | 21 |
| 132 | PC-5p-30666_54  | TTACCATCAAATACTTGGTCC     | 21 |
| 133 | PC-3p-478647_3  | G TTCAGGTAGGAAAAGGGAACAAC | 24 |
| 134 | PC-3p-332075_4  | TTTAATTGTCATAGTTTCCTCTT   | 23 |
| 135 | PC-3p-206768_6  | GTTGACACCTAATTTTGACCCGCC  | 24 |
| 136 | PC-3p-111603_11 | TGCAGCTTTGGGAGTTTGAC      | 21 |
| 137 | PC-3p-256511_5  | AATCTATGATCAAACGTTAGCTGA  | 24 |
